# Supplementary material for: P2-layered Na0.5Li0.07Mn0.61Co0.16Ni0.16O2 cathode boosted Na-storage properties via rational sub-group element doping
Source: Royal Society of Chemistry journal article supplement (doi:10.1039/d1ta03238k), 2021-01-01
Supplement: d1ta03238k1.pdf [file d1ta03238k1.pdf]

Supplementary Material

**P2-layered  $\text{Na}_{0.5}\text{Li}_{0.07}\text{Mn}_{0.61}\text{Co}_{0.16}\text{Ni}_{0.16}\text{O}_2$  cathode boosted Na-storage properties by rational sub-group element doping**

Dongmei Dai,<sup>a,†</sup> Jinxu Qiu,<sup>a,b,†</sup> Hongying Hou,<sup>b</sup> Xiaojuan Wang,<sup>a</sup> Siyuan Li,<sup>c</sup> Bobo Cao,<sup>a</sup> Xinxin Zhou,<sup>a</sup> Dai-Huo Liu,<sup>a,\*</sup> Bao Wang<sup>d,\*</sup> and Bao Li<sup>a,\*</sup>

a Collaborative Innovation Center of Henan Province for Green Manufacturing of Fine Chemicals, Key Laboratory of Green Chemical Media and Reactions, Ministry of Education, School of Chemistry and Chemical Engineering, Henan Normal University, Xinxiang, 453007, China. Email addresses: liudaihuo@htu.edu.cn (D.H. L.); libao@htu.edu.cn (B. L.)

b Faculty of Material Science and Engineering, Kunming University of Science and Technology, Kunming, 650093, China.

c Affiliated Middle School of Henan Normal University, Xinxiang, 453007, China.

d State Key Laboratory of Biochemical Engineering, Institute of Process Engineering, Chinese Academy of Sciences, Beijing 100190, China. Email addresses: baowang@ipe.ac.cn (B. W.).

† Equal contribution

**Table S1** Elemental composition from ICP-OES results.

| <b>Theoretical chemical formula</b>                                                                                      | <b>Measured atomic ratio</b> |       |       |       |       |       |       |       |
|--------------------------------------------------------------------------------------------------------------------------|------------------------------|-------|-------|-------|-------|-------|-------|-------|
|                                                                                                                          | Na                           | Li    | Mn    | Co    | Ni    | Cu    | Ag    | Au    |
| <b>Na<sub>0.5</sub>Li<sub>0.07</sub>Mn<sub>0.61</sub>Co<sub>0.16</sub>Ni<sub>0.16</sub>O<sub>2</sub></b>                 | 0.506                        | 0.069 | 0.614 | 0.165 | 0.160 | 0.000 | 0.000 | 0.000 |
| <b>Na<sub>0.5</sub>Li<sub>0.07</sub>Mn<sub>0.6</sub>Co<sub>0.16</sub>Ni<sub>0.16</sub>Cu<sub>0.01</sub>O<sub>2</sub></b> | 0.507                        | 0.072 | 0.604 | 0.157 | 0.162 | 0.013 | 0.000 | 0.000 |
| <b>Na<sub>0.5</sub>Li<sub>0.07</sub>Mn<sub>0.6</sub>Co<sub>0.16</sub>Ni<sub>0.16</sub>Ag<sub>0.01</sub>O<sub>2</sub></b> | 0.501                        | 0.068 | 0.607 | 0.161 | 0.157 | 0.000 | 0.014 | 0.000 |
| <b>Na<sub>0.5</sub>Li<sub>0.07</sub>Mn<sub>0.6</sub>Co<sub>0.16</sub>Ni<sub>0.16</sub>Au<sub>0.01</sub>O<sub>2</sub></b> | 0.503                        | 0.071 | 0.598 | 0.167 | 0.161 | 0.000 | 0.000 | 0.011 |

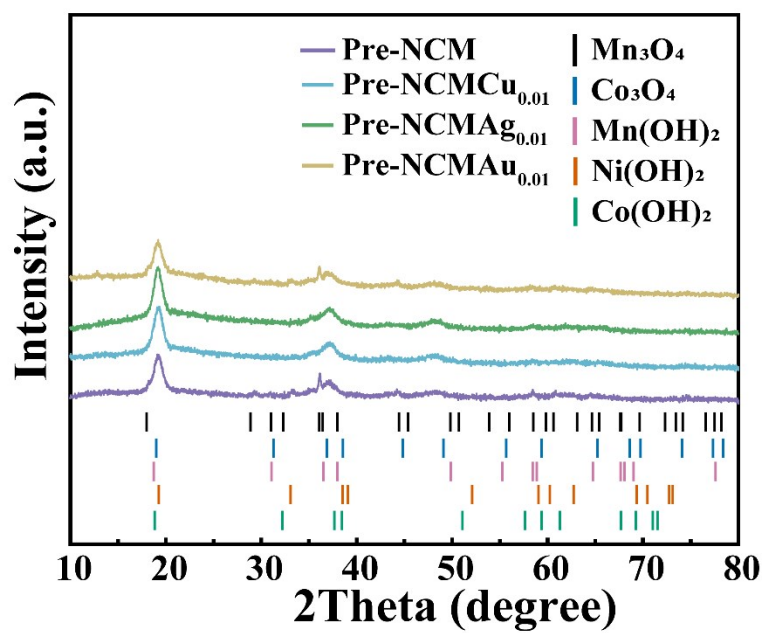

Fig. S1 Powder X-ray diffraction pattern of the precursors.

**Table S2** Refined results of NCM, NCMCu<sub>0.01</sub>, NCMAg<sub>0.01</sub>, and NCMAu<sub>0.01</sub> samples.

| <b>Samples</b>              | <b>a/b(Å)</b> | <b>c(Å)</b>  | <b>V(Å<sup>3</sup>)</b> | <b>Na-O(Å)</b> | <b>TM-O(Å)</b> | <b>R<sub>wp</sub>(%)</b> | <b>R<sub>p</sub>(%)</b> | <b>chi<sup>2</sup></b> |
|-----------------------------|---------------|--------------|-------------------------|----------------|----------------|--------------------------|-------------------------|------------------------|
| <b>NCM</b>                  | 2.85469(6)    | 11.19946(19) | 79.0397(28)             | 2.550(3)       | 1.8564(16)     | 3.50                     | 2.40                    | 1.297                  |
| <b>NCMCu<sub>0.01</sub></b> | 2.85515(6)    | 11.20068(18) | 79.0737(27)             | 2.575(3)       | 1.8417(16)     | 3.52                     | 2.46                    | 1.382                  |
| <b>NCMAg<sub>0.01</sub></b> | 2.85561(8)    | 11.20130(20) | 79.0958(28)             | 2.591(3)       | 1.8320(17)     | 4.35                     | 3.03                    | 1.378                  |
| <b>NCMAu<sub>0.01</sub></b> | 2.85602(6)    | 11.20399(20) | 79.1453(28)             | 2.609(3)       | 1.8234(16)     | 4.06                     | 2.87                    | 1.299                  |

**Table S3** Crystallographic parameters of four samples refined by the Rietveld refinement.

| Materials             | Atom            | Site | X   | Y   | Z           | Occ  |
|-----------------------|-----------------|------|-----|-----|-------------|------|
| NCM                   | Mn              | 2a   | 0   | 0   | 0           | 0.61 |
|                       | Co              | 2a   | 0   | 0   | 0           | 0.16 |
|                       | Ni              | 2a   | 0   | 0   | 0           | 0.16 |
|                       | Na <sub>e</sub> | 2d   | 1/3 | 2/3 | 3/4         | 0.25 |
|                       | Na <sub>f</sub> | 2b   | 0   | 0   | 1/4         | 0.25 |
|                       | Li              | 2a   | 0   | 0   | 0           | 0.07 |
|                       | O               | 4f   | 1/3 | 2/3 | 0.07628(32) | 1    |
| NCMCu <sub>0.01</sub> | Mn              | 2a   | 0   | 0   | 0           | 0.60 |
|                       | Co              | 2a   | 0   | 0   | 0           | 0.16 |
|                       | Ni              | 2a   | 0   | 0   | 0           | 0.16 |
|                       | Cu              | 2a   | 0   | 0   | 0           | 0.01 |
|                       | Na <sub>e</sub> | 2d   | 1/3 | 2/3 | 3/4         | 0.25 |
|                       | Na <sub>f</sub> | 2b   | 0   | 0   | 1/4         | 0.25 |
|                       | O               | 4f   | 1/3 | 2/3 | 0.07334(31) | 1    |
| NCMAg <sub>0.01</sub> | Mn              | 2a   | 0   | 0   | 0           | 0.60 |
|                       | Co              | 2a   | 0   | 0   | 0           | 0.16 |
|                       | Ni              | 2a   | 0   | 0   | 0           | 0.16 |
|                       | Ag              | 2a   | 0   | 0   | 0           | 0.01 |
|                       | Na <sub>e</sub> | 2d   | 1/3 | 2/3 | 3/4         | 0.25 |
|                       | Na <sub>f</sub> | 2b   | 0   | 0   | 1/4         | 0.25 |
|                       | O               | 4f   | 1/3 | 2/3 | 0.06949(33) | 1    |
| NCMAu <sub>0.01</sub> | Mn              | 2a   | 0   | 0   | 0           | 0.60 |
|                       | Co              | 2a   | 0   | 0   | 0           | 0.16 |
|                       | Ni              | 2a   | 0   | 0   | 0           | 0.16 |
|                       | Au              | 2a   | 0   | 0   | 0           | 0.01 |
|                       | Na <sub>e</sub> | 2d   | 1/3 | 2/3 | 3/4         | 0.25 |
|                       | Na <sub>f</sub> | 2b   | 0   | 0   | 1/4         | 0.25 |
|                       | O               | 4f   | 1/3 | 2/3 | 0.06949(33) | 1    |

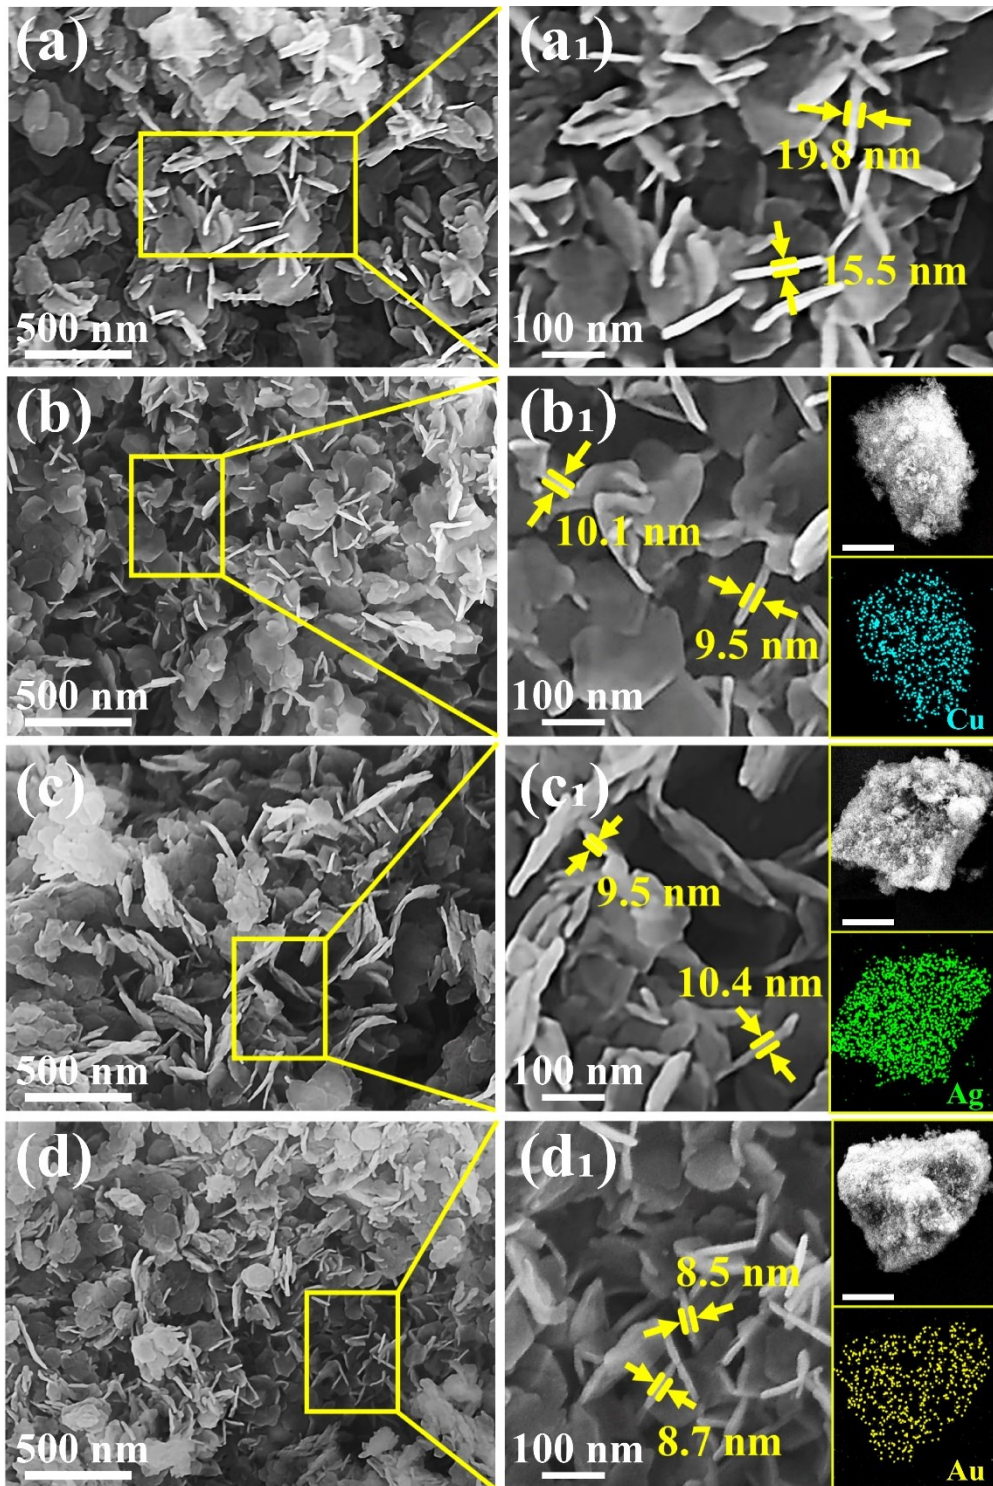

**Fig. S2** SEM images with different magnifications and corresponding EDS mapping of as-prepared (a, a<sub>1</sub>) Pre-NCM, (b, b<sub>1</sub>) Pre-NCMCu<sub>0.01</sub>, (c, c<sub>1</sub>) Pre-NCMAg<sub>0.01</sub> and (d, d<sub>1</sub>) Pre-NCMAu<sub>0.01</sub> precursors. (The scales of all insets are 10 μm)

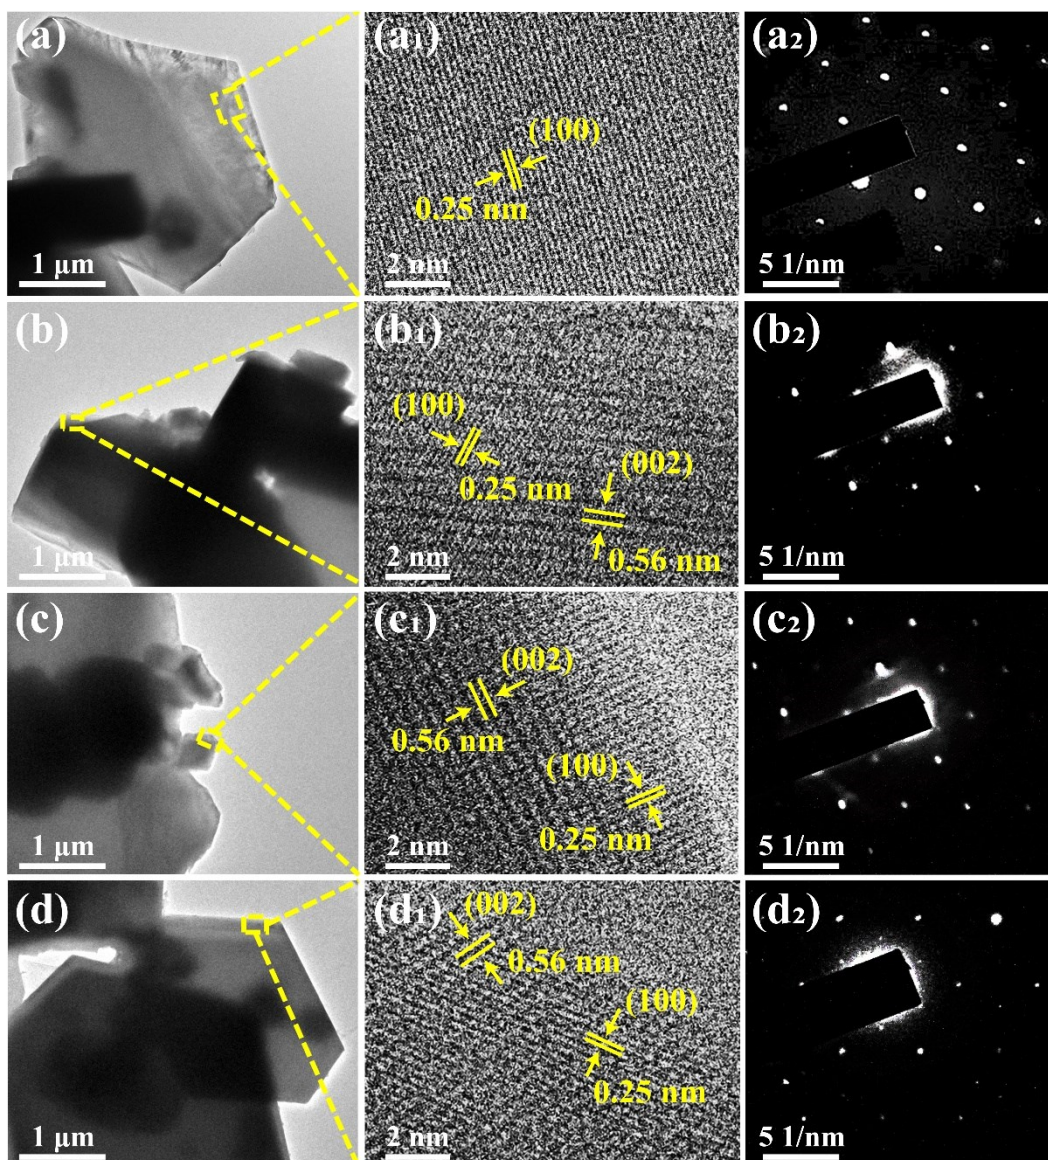

**Fig. S3** TEM, high-resolution TEM images and corresponding SAED patterns of as-prepared (a, a<sub>1</sub>, a<sub>2</sub>) NCM, (b, b<sub>1</sub>, b<sub>2</sub>) NCMCu<sub>0.01</sub>, (c, c<sub>1</sub>, c<sub>2</sub>) NCMAg<sub>0.01</sub> and (d, d<sub>1</sub>, d<sub>2</sub>) NCMAu<sub>0.01</sub> samples.

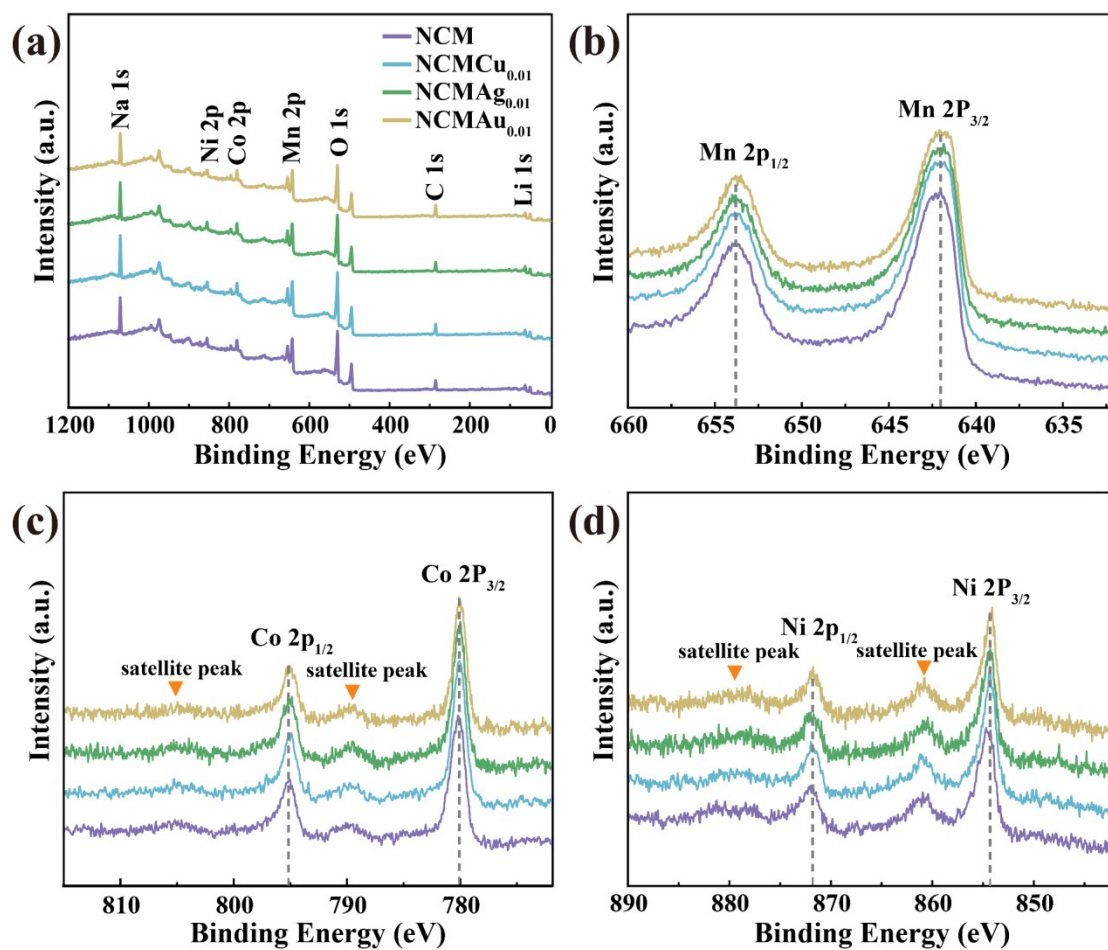

**Fig. S4** XPS spectra of NCM, NCMCu<sub>0.01</sub>, NCMAg<sub>0.01</sub> and NCMAu<sub>0.01</sub> samples: (a) The survey spectrum, (b) Mn 2p, (c) Co 2p, and (d) Ni 2p.



**Table S4** The fitting results of four samples from EIS curves.

| Sample                | $R_s/\Omega$ | $R_f/\Omega$ | $R_{ct}/\Omega$ | $i_0/(\text{mA cm}^{-2})$ |
|-----------------------|--------------|--------------|-----------------|---------------------------|
| NCM                   | 2.40         | 8.77         | 427.8           | $5.31 \times 10^{-2}$     |
| NCMCu <sub>0.01</sub> | 2.00         | 5.78         | 618.7           | $3.67 \times 10^{-2}$     |
| NCMAg <sub>0.01</sub> | 1.95         | 5.47         | 315.9           | $7.19 \times 10^{-2}$     |
| NCMAu <sub>0.01</sub> | 1.91         | 4.43         | 264.0           | $8.61 \times 10^{-2}$     |

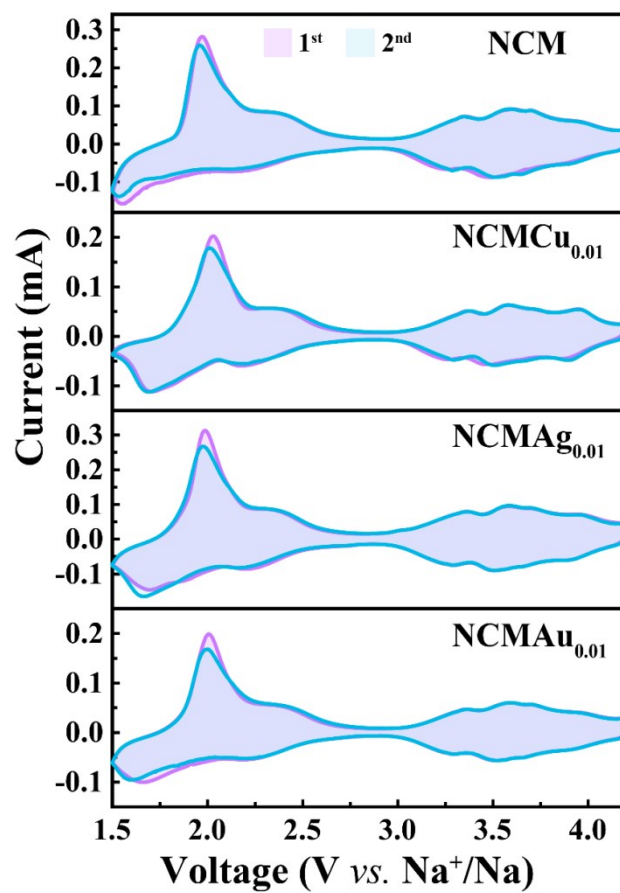

**Fig. S5** The CV curves at a scan rate of  $0.1 \text{ mV s}^{-1}$  in the voltage range of 1.5- 4.2 V.

**Table S5** Comparison results of three different space-occupying for Au<sup>+</sup> via Rietveld refinement.

| Samples                   | a/b(Å)      | c(Å)         | V(Å <sup>3</sup> ) | R <sub>wp</sub> (%) | R <sub>p</sub> (%) | chi <sup>2</sup> |
|---------------------------|-------------|--------------|--------------------|---------------------|--------------------|------------------|
| NCM                       | 2.85469(6)  | 11.19946(19) | 79.0397(28)        | 3.50                | 2.40               | 1.297            |
| NCMAu <sub>0.01</sub> -2b | 2.85303(17) | 11.17476(28) | 78.774(7)          | 6.35                | 3.94               | 2.740            |
| NCMAu <sub>0.01</sub> -2d | —           | —            | —                  | —                   | —                  | —                |
| NCMAu <sub>0.01</sub> -2a | 2.85602(6)  | 11.20399(20) | 79.1453(28)        | 4.06                | 2.87               | 1.299            |

**Table S6** Comparison results of three different space-occupying for Au<sup>+</sup> via Rietveld refinement.

| Materials                 | Atom            | Site | X   | Y   | Z         | Occ  |
|---------------------------|-----------------|------|-----|-----|-----------|------|
| NCMAu <sub>0.01</sub> -2b | Mn              | 2a   | 0   | 0   | 0         | 0.60 |
|                           | Co              | 2a   | 0   | 0   | 0         | 0.16 |
|                           | Ni              | 2a   | 0   | 0   | 0         | 0.16 |
|                           | Au              | 2b   | 0   | 0   | 1/4       | 0.01 |
|                           | Na <sub>e</sub> | 2d   | 1/3 | 2/3 | 3/4       | 0.25 |
|                           | Na <sub>f</sub> | 2b   | 0   | 0   | 1/4       | 0.24 |
|                           | Li              | 2a   | 0   | 0   | 0         | 0.07 |
| NCMAu <sub>0.01</sub> -2d | O               | 4f   | 1/3 | 2/3 | 0.0683(4) | 1    |
|                           | Mn              | 2a   | 0   | 0   | 0         | 0.60 |
|                           | Co              | 2a   | 0   | 0   | 0         | 0.16 |
|                           | Ni              | 2a   | 0   | 0   | 0         | 0.16 |
|                           | Au              | 2d   | 1/3 | 2/3 | 3/4       | 0.01 |
|                           | Na <sub>e</sub> | 2d   | 1/3 | 2/3 | 3/4       | 0.24 |
|                           | Li              | 2a   | 0   | 0   | 0         | 0.07 |

|                           |                 |    |     |     |             |      |
|---------------------------|-----------------|----|-----|-----|-------------|------|
|                           | O               | 4f | 1/3 | 2/3 | 0.0872      | 1    |
|                           | Mn              | 2a | 0   | 0   | 0           | 0.60 |
|                           | Co              | 2a | 0   | 0   | 0           | 0.16 |
|                           | Ni              | 2a | 0   | 0   | 0           | 0.16 |
| NCMAu <sub>0.01</sub> -2a | Au              | 2a | 0   | 0   | 0           | 0.01 |
|                           | Na <sub>e</sub> | 2d | 1/3 | 2/3 | 3/4         | 0.25 |
|                           | Na <sub>f</sub> | 2b | 0   | 0   | 1/4         | 0.25 |
|                           | Li              | 2a | 0   | 0   | 0           | 0.07 |
|                           | O               | 4f | 1/3 | 2/3 | 0.06949(33) | 1    |

Table S5 and S6 compare the refinement results of Au<sup>+</sup> doping into different locations. Firstly, we hypothesis the Au<sup>+</sup> doped to the site of Na<sup>+</sup>, there are two situations as below: (1) When Au<sup>+</sup> occupying the Na<sub>f</sub> position (labeled as NCMAu<sub>0.01</sub>-2b), the refinement results of the lattice parameters a/b, c and V are not only smaller than undoped NCM, but also the convergence of the refinement results is inferior to undoped NCM. Additionally, this assumption is not consistent with the facts because the radius of Au<sup>+</sup> is larger than the Na<sup>+</sup>; (2) When the Na<sub>e</sub> position is occupied by Au<sup>+</sup> (NCMAu<sub>0.01</sub>-2d), the refinement results are divergent; (3) When the Au<sup>+</sup> occupies the transition metal position (NCMAu<sub>0.01</sub>-2a), the unit cell parameters and unit cell volume are larger than undoped NCM, the refinement result is convergent, these results are consistent with the fact of large Au<sup>+</sup> radius. In view of the above-mentioned facts and discussion, Au<sup>+</sup> and Ag<sup>+</sup> should occupy the sites of transition metals.
